# Supplementary material
Source: PubMed Central journal article supplement (PMC4039365)

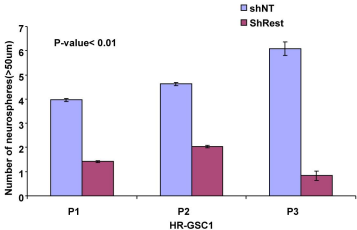

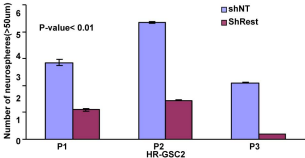

# Majumder S et al. Supplementary Fig 2

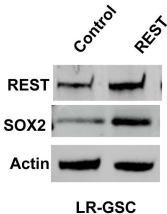

Majumder, S. et al. Supplementary Fig 3

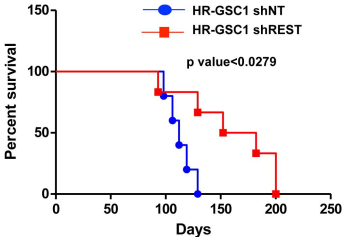

Majumder S et al. Supplementary Fig 4

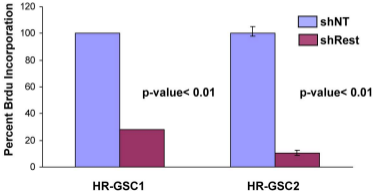

Majumder, S. et al. Supplementary Fig 5

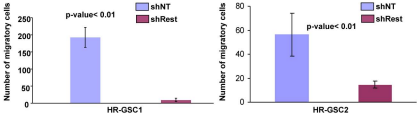

Supplement: NIHMS523915-supplement-Supp_Fig_S1-S5.pdf [file NIHMS523915-supplement-Supp_Fig_S1-S5.pdf]
